# Supplementary material for: Freezing of Gait in Parkinson’s Disease Patients Treated with Bilateral Subthalamic Nucleus Deep Brain Stimulation: A Long-Term Overview
Source: MDPI journal article supplement (doi:10.3390/biomedicines10092214), 2022-09-07
Supplement: s1 [file s1]

**Table S1.** Stimulation parameters at post-operative long-term evaluation

| <b>Stimulation parameters and settings</b> | <b>Total n= 20<br/>N. (%), mean, [±SD]; median {range}</b> |
|--------------------------------------------|------------------------------------------------------------|
| <b>Frequency setting</b>                   |                                                            |
| High frequency                             | 17 (85.00%)                                                |
| Low frequency                              | 3 (15.00%)                                                 |
| <b>Left STN</b>                            |                                                            |
| <b>Single monopolar stimulation</b>        | 15 (75.00%)                                                |
| <b>Bipolar stimulation</b>                 | 2 (10.00%)                                                 |
| <b>Double monopolar stimulation</b>        | 3 (15.00%)                                                 |
| <b>Voltage (V)</b>                         | 2.640 [± 0.792];<br>2.800 {0.652-3.900}                    |
| <b>Frequency (Hz)</b>                      | 132.500 [± 28.81];<br>130.000 {80.000-180.000}             |
| <b>Pulse width (usec)</b>                  | 64.500 [± 10.990];<br>60.000 {60.000 - 90.000}             |
| <b>Impedance (Ω)</b>                       | 937.150 [± 184.256];<br>945.500 {662.00 -1407.00}          |
| <b>Power of stimulation</b>                | 66.535 [± 31.974];<br>69.302 {4.240-135.871}               |
| <b>Right STN</b>                           |                                                            |
| <b>Single monopolar stimulation</b>        | 18 (90.00%)                                                |
| <b>Bipolar stimulation</b>                 | 0 (.00%)                                                   |
| <b>Double monopolar stimulation</b>        | 2 (10.00%)                                                 |
| <b>Voltage (V)</b>                         | 2.466 [± 0.808];<br>2.650 {0.746-4.100}                    |
| <b>Frequency (Hz)</b>                      | 123.400 [± 37.135];<br>130.000 {60.000-180.000}            |
| <b>Pulse width (usec)</b>                  | 69.500 [± 18.771];<br>60.000 {60.000-130.000}              |
| <b>Impedance (Ω)</b>                       | 964.850 [± 218.867];<br>951.500 {566.00 -1474.00}          |
| <b>Power of stimulation</b>                | 56.599 [± 33.375];<br>50.022 {5.281 -121.571}              |
